# Supplementary material for: Multilayered Curcumin-loaded Hydrogel Microcarriers With Antimicrobial Function
Source: Preprints.org preprint supplement (doi:10.20944/preprints202201.0410.v1), 2022-01-27
Supplement: Supplementary file 1 [file supplementary]

**Electronic Supplementary Material (ESI)**

Multilayered curcumin-loaded hydrogel microcarriers with antimicrobial function

Weronika Szczęsna1, Marta Tsirigotis-Maniecka1, Łukasz Lamch1, Lilianna Szyk-Warszyńska2, Ewa Zboińska3, Piotr Warszyński2,*, Kazimiera A. Wilk1,*

1 Department of Engineering and Technology of Chemical Processes, Faculty of Chemistry, Wrocław University of Science and Technology, 50-370 Wrocław, Poland; weronika.szczesna@pwr.edu.pl; marta.tsirigotis@pwr.edu.pl; lukasz.lamch@pwr.edu.pl; kazimiera.wilk@pwr.edu.pl

2 Jerzy Haber Institute of Catalysis and Surface Chemistry, Polish Academy of Sciences, 30-239 Kraków, Poland; ncszyk@cyf-kr.edu.pl; ncwarszy@cyf-kr.edu.pl

3 Department of Organic and Medicinal Chemistry, Faculty of Chemistry, Wrocław University of Science and Technology, 50-370 Wrocław, Poland; ewa.zboinska@pwr.edu.pl

***** Correspondence: ncwarszy@cyf-kr.edu.pl; kazimiera.wilk@pwr.edu.pl

Table of Contents

**Figure S1**. FTIR spectra of CUR-loaded microparticles decorated with A-QAS-PEs: CHIT system (**a**) and PAH system (**b**).

**Figure S2.** FTIR spectra of CUR, CU, CC, and CP.

**Figure S3.** Adsorption kinetic measurements of polyelectrolyte multilayers monitored by QCM-D: (**a**) PEI/CUR/ALG/CHIT/**1**; (**b**) PEI/CUR/ALG/CHIT/**2**;
(**c**) PEI/CUR/ALG/CHIT/**3**; (**d**) PEI/CUR/ALG/CHIT/**4**; (**e**) PEI/CUR/ALG/CHIT/PAA; (**f**) PEI/CUR/ALG/PAH/PAA; (**g**) PEI/CUR/ALG/PAH/**1**; (**h**) PEI/CUR/ALG/PAH/**2**; (**i**) PEI/CUR/ALG/PAH/**3**; (**j**) PEI/CUR/ALG/PAH/**4**. Blue lines illustrate frequency shifts (Δf), while red lines illustrate dissipation shifts (ΔD) of polyelectrolyte multilayers. Resonance frequency variations and dissipation variations are recorded as functions of time.

**Figure S4.** CUR release profiles from CU (squares), CC (circles), and CP (triangles) microparticles. The lines correspond to the fitting curves of the hybrid model to the payload release profiles.

**Table S1.** Film thickness characterization by spectroscopic ellipsometry.


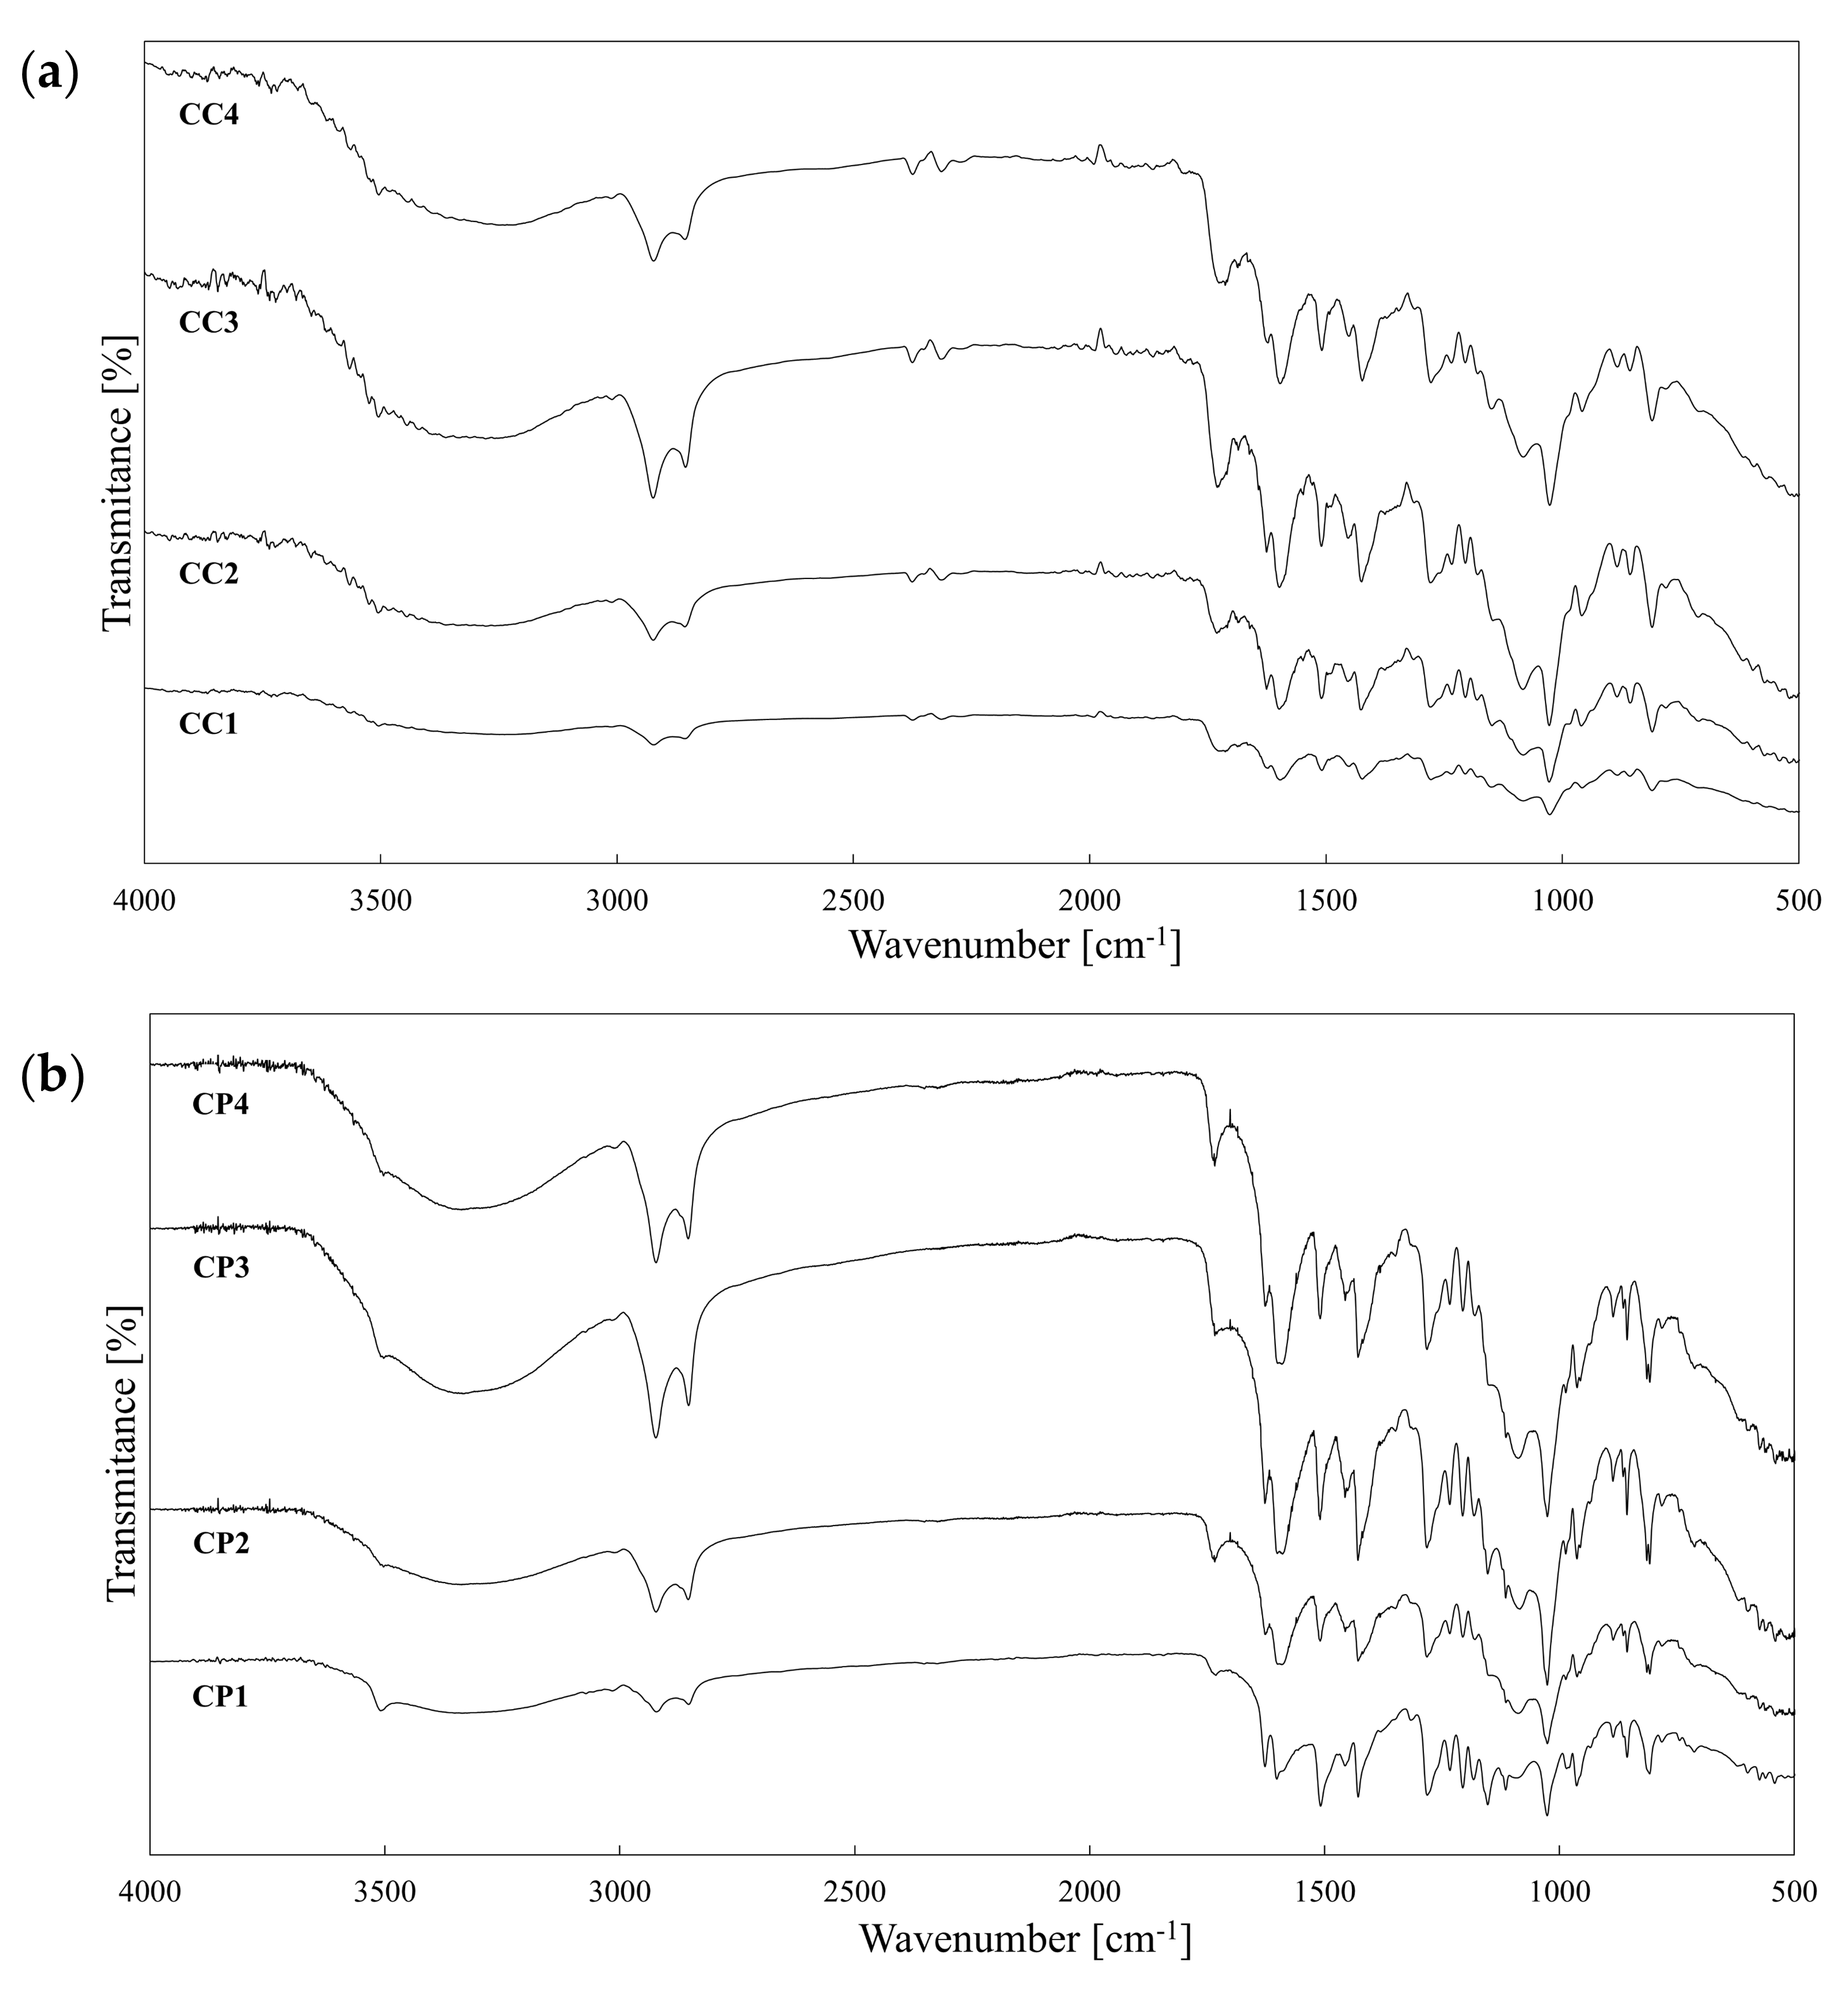


**Figure S1.** FTIR spectra of CUR-loaded microparticles decorated with A-QAS-PAAs: CHIT system (**a**) and PAH system (**b**).


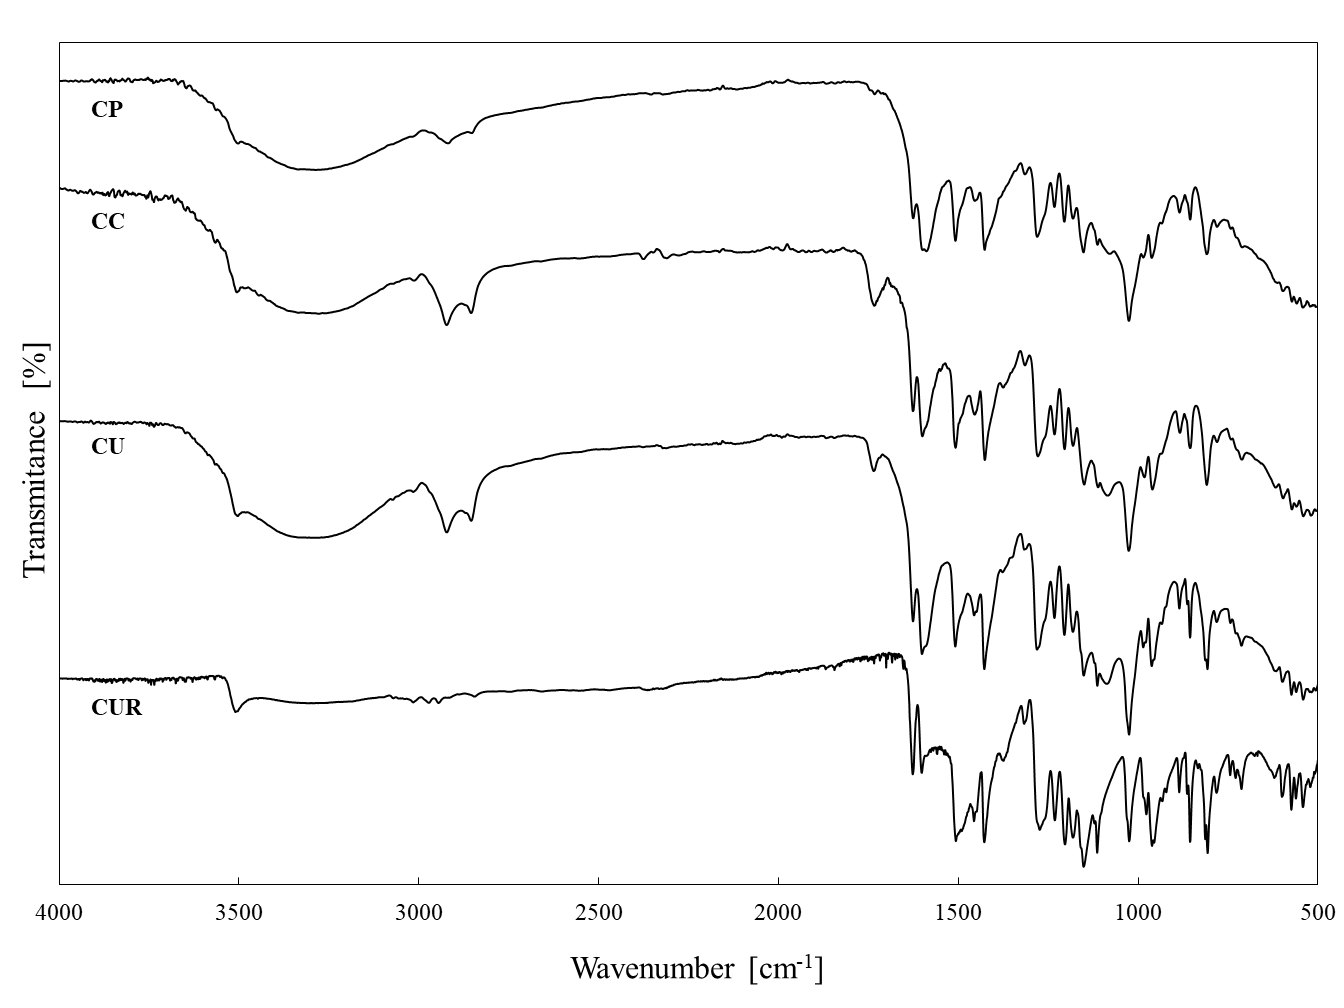


**Figure S2.** FTIR spectra of CUR, CU, CC and CP.

**
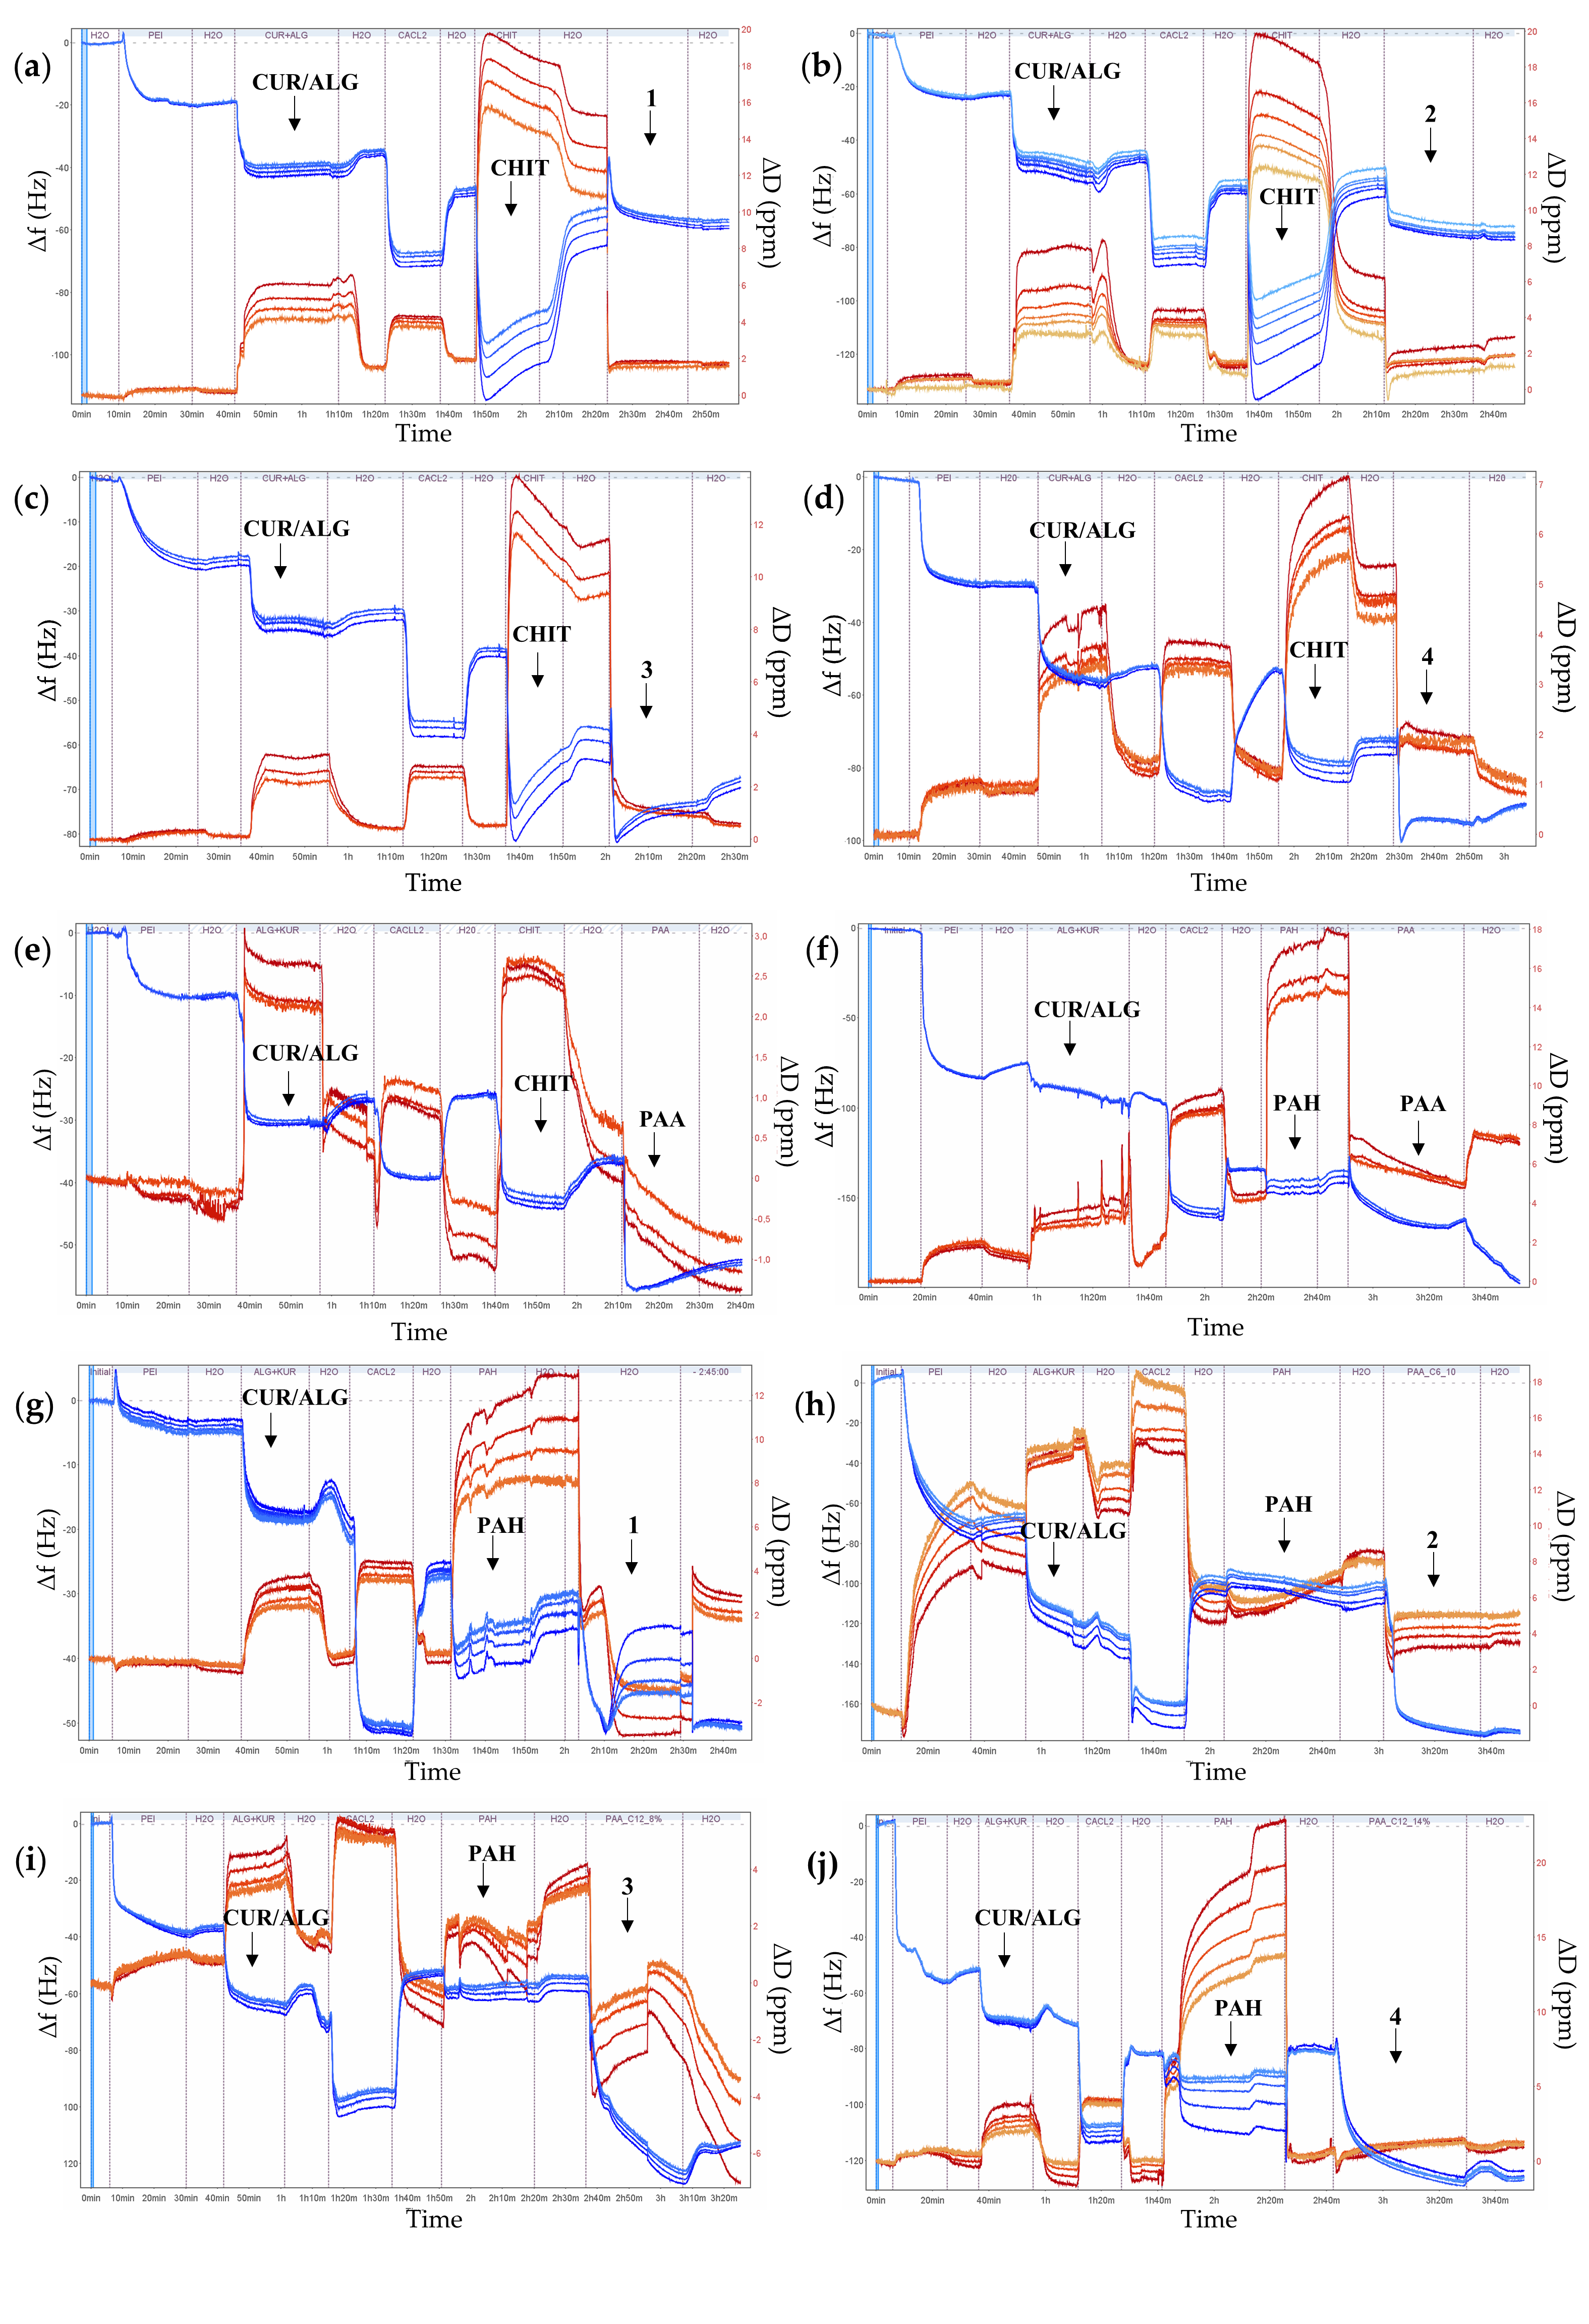
**

**Figure S3.** Adsorption kinetic measurements of polyelectrolyte multilayers monitored by QCM-D: (**a**) PEI/CUR/ALG/CHIT/**1**; (**b**) PEI/CUR/ALG/CHIT/**2**;
(**c**) PEI/CUR/ALG/CHIT/**3**; (**d**) PEI/CUR/ALG/CHIT/**4**; (**e**) PEI/CUR/ALG/CHIT/PAA; (**f**) PEI/CUR/ALG/PAH/PAA; (**g**) PEI/CUR/ALG/PAH/**1**; (**h**) PEI/CUR/ALG/PAH/**2**; (**i**) PEI/CUR/ALG/PAH/**3**; (**j**) PEI/CUR/ALG/PAH/**4**. Blue lines illustrate frequency shifts (Δf), while red lines illustrate dissipation shifts (ΔD) of polyelectrolyte multilayers. Resonance frequency variations and dissipation variations are recorded as functions of time.


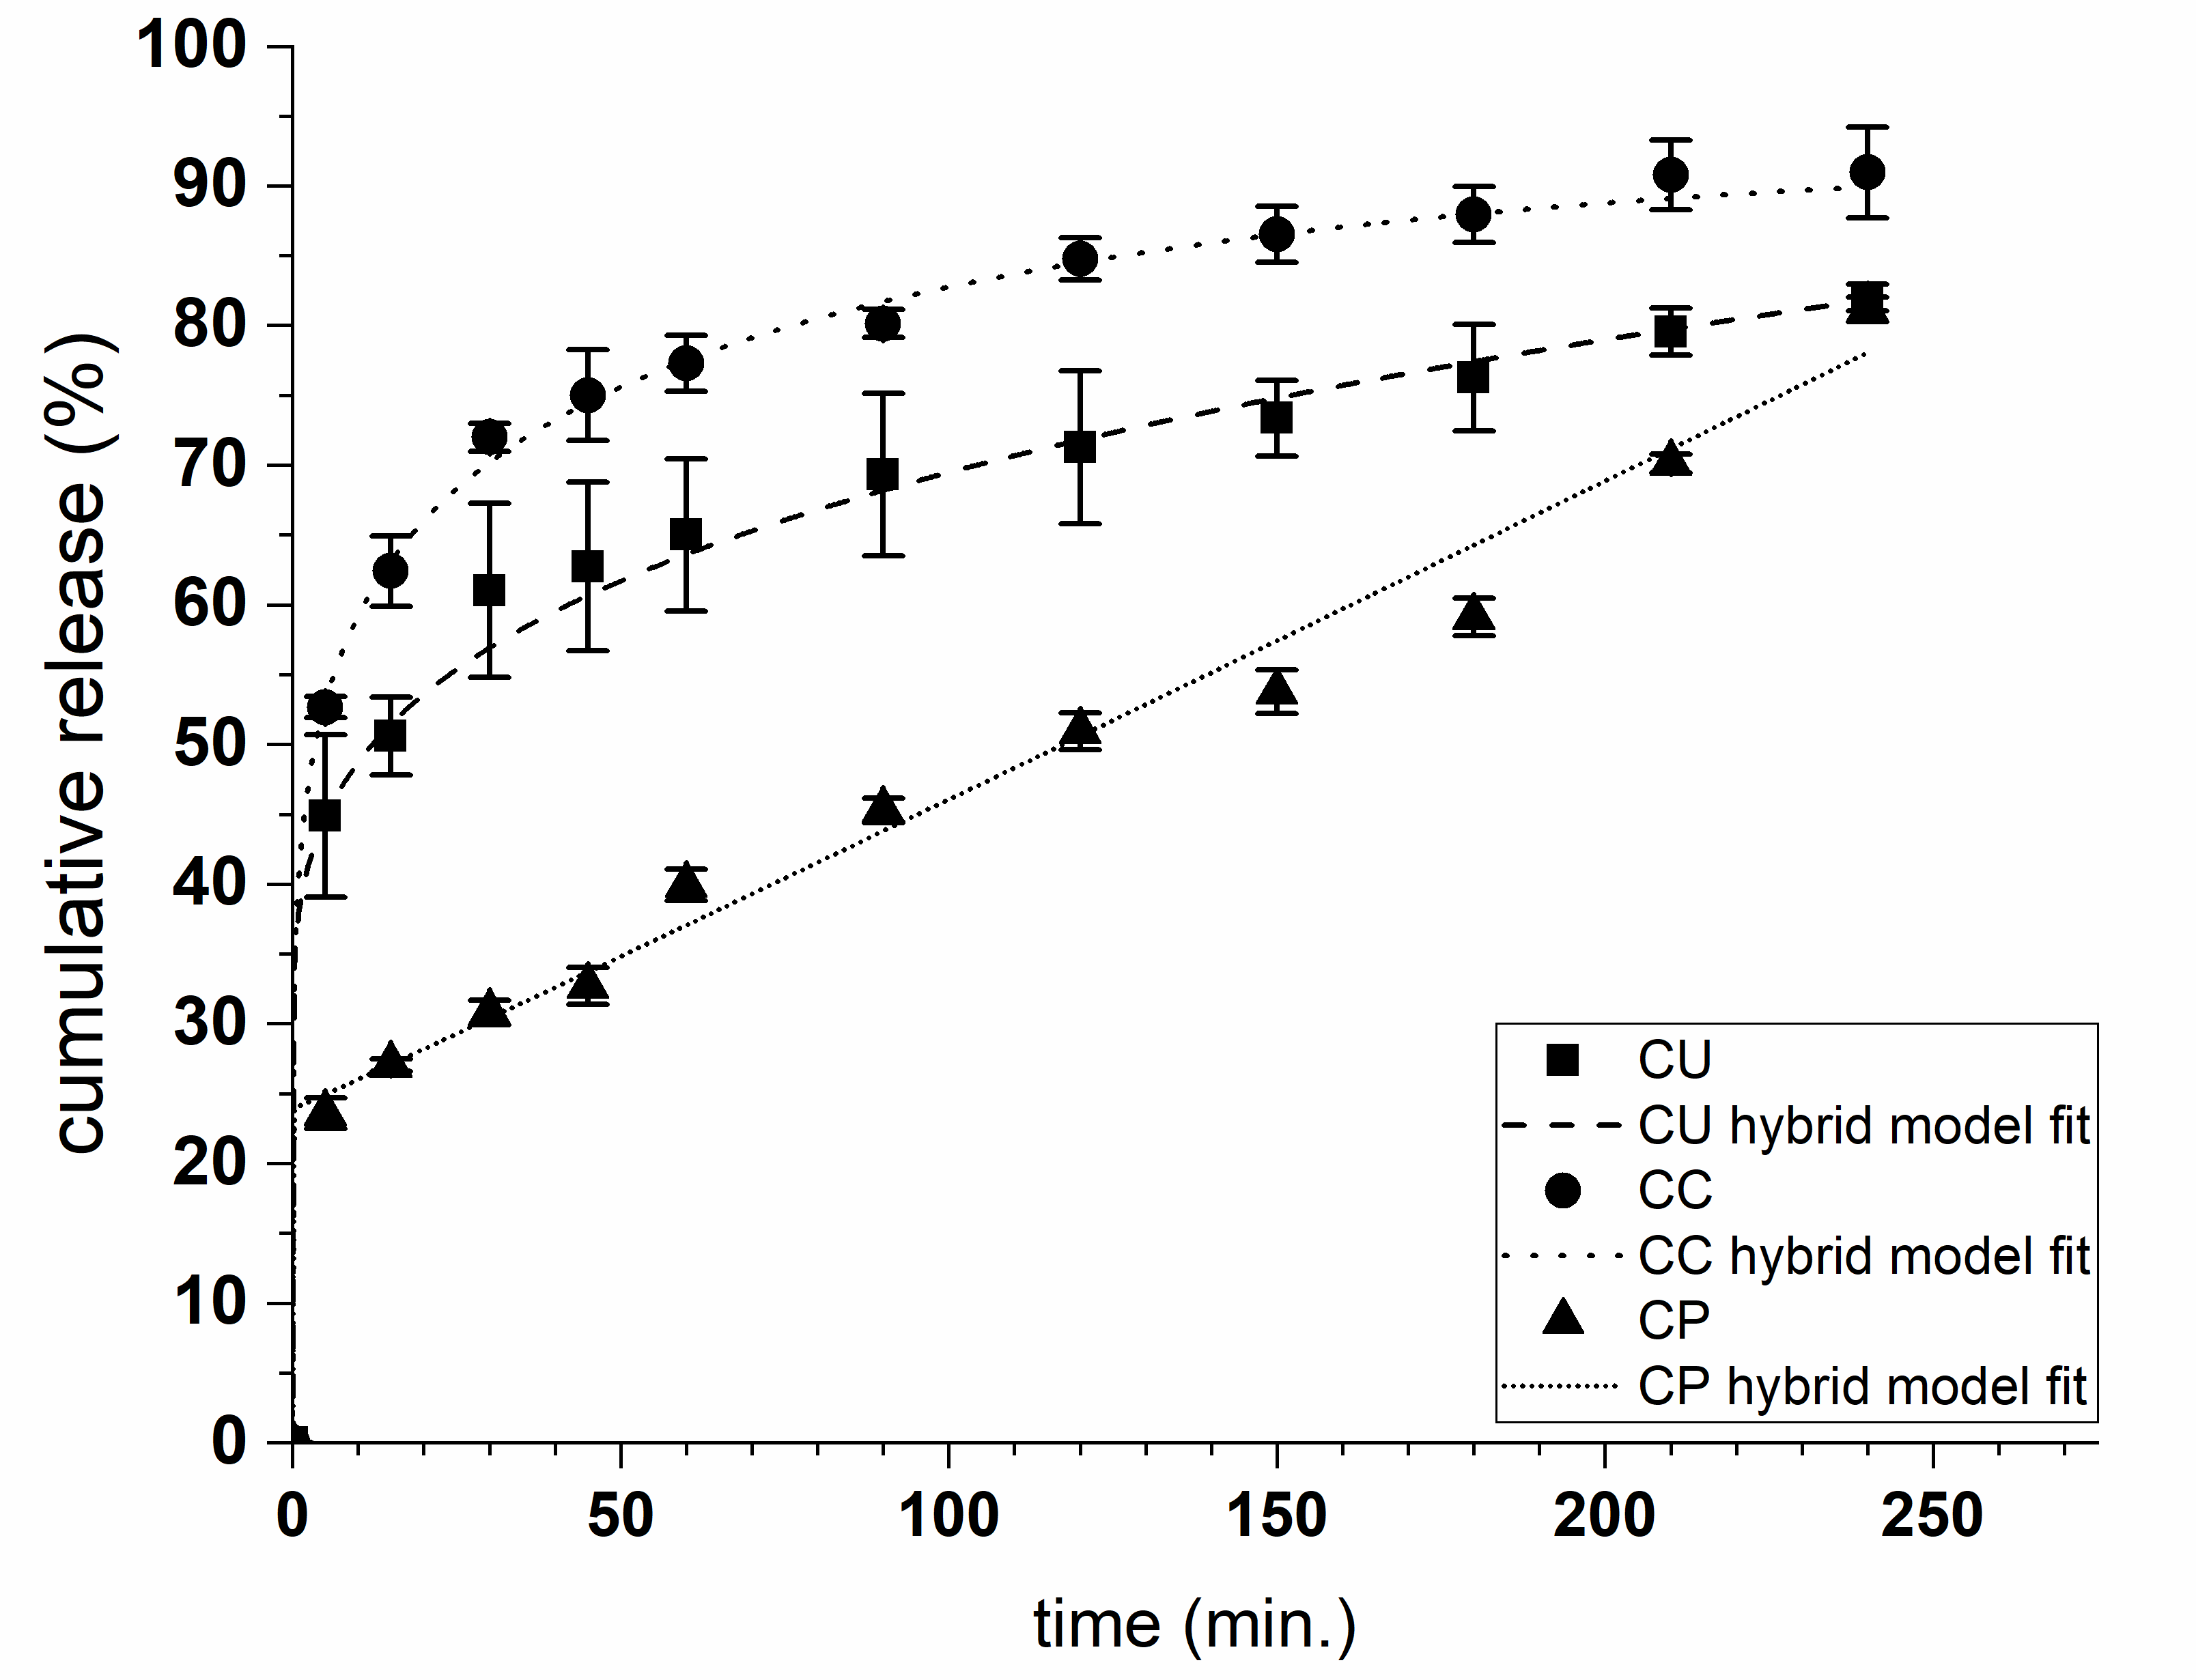


**Figure S4.** Release profiles of CUR from CU (squares), CC (circles), and CP (triangles) microparticles. Lines correspond to the fitting curves of the hybrid model to the payload release profiles.

**Table S1.** Film thickness characterization by spectroscopic ellipsometry.

|  | **PE layer** | **thickness**  **[nm]** |  | **PE layer** | **thickness**  **[nm]** |
| --- | --- | --- | --- | --- | --- |
|  | CUR/ALG | 1.6±0.1 |  | CUR/ALG | 1.6±0.1 |
| CHIT system | CHIT | 1.4±0.1 | PAH system | PAH | 2.2±0.2 |
| PAA | 0.8±0.2 | PAA | 1.3±0.2 |
| PAA-C(O)O-(CH2)6-N+(CH3)3-8% | 4.7±0.2 | PAA-C(O)O-(CH2)6-N+(CH3)3-8% | 7.2±0.7 |
| PAA-C(O)O-(CH2)6-N+(CH3)3-10% | 6.4±1.4 | PAA-C(O)O-(CH2)6-N+(CH3)3-10% | 7.6±0.3 |
| PAA-C(O)O-(CH2)12-N+(CH3)3-8% | 1.1±0.2 | PAA-C(O)O-(CH2)12-N+(CH3)3-8% | 1.0±0.3 |
| PAA-C(O)O-(CH2)12-N+(CH3)3-14% | 1.0±0.4 | PAA-C(O)O-(CH2)12-N+(CH3)3-14% | 0.8±0.3 |
